# Supplementary material for: Influence of travel time and distance to the hospital of care on stillbirths: a retrospective facility-based cross-sectional study in Lagos, Nigeria
Source: PubMed Central journal article supplement — BMJ Glob Health. 2021 Oct 6;6(10):e007052. doi: 10.1136/bmjgh-2021-007052 (PMC8496383; doi:10.1136/bmjgh-2021-007052), 2021-10-06
Supplement: bmjgh-2021-007052supp001.pdf [file bmjgh-2021-007052supp001.pdf]

Banke-Thomas et al. 2021

**Supplementary Table S1:** Additional information on Lagos public hospitals

| S/N | Facility name                                          | Latitude (x) | Longitude (y) | Facility type     | Year of commission | Births in 2018 |
|-----|--------------------------------------------------------|--------------|---------------|-------------------|--------------------|----------------|
| 1   | Agbowo General Hospital                                | 6.645643     | 3.712914      | General Hospital  | 2003               | 157            |
| 2   | Ajeromi Ifelodun General Hospital                      | 6.455283     | 3.33362       | MCC               | 1983               | 825            |
| 3   | Alimosho General Hospital                              | 6.561196     | 3.250662      | MCC               | 2006               | 2,484          |
| 4   | Amuwo-Odofin MCC                                       | 6.461779     | 3.301963      | MCC               | 2014               | 2,484          |
| 5   | Apapa General Hospital                                 | 6.441943     | 3.368962      | General Hospital  | 1964               | 120            |
| 6   | Badagry General Hospital                               | 6.413752     | 2.900374      | General Hospital  | 1957               | 973            |
| 7   | Epe General Hospital                                   | 6.586945     | 3.971665      | General Hospital  | 1954               | 883            |
| 8   | Eti-Osa MCC*                                           | 6.465421     | 3.585173      | MCC               | 2019               | -              |
| 9   | FMC Ebute-Metta                                        | 6.484271     | 3.380194      | Tertiary Hospital | 1964               | 1,820          |
| 10  | Gbagada General Hospital                               | 6.551919     | 3.387304      | General Hospital  | 1983               | 1,729          |
| 11  | Harvey Road Health Centre                              | 6.50935      | 3.372629      | General Hospital  | 1962               | 717            |
| 12  | Ibeju-Lekki General Hospital                           | 6.439312     | 3.934335      | General Hospital  | 2006               | 982            |
| 13  | Ifako-Ijaiye MCC                                       | 6.680364     | 3.291382      | MCC               | 2006               | 2,916          |
| 14  | Ijede Health Care Centre                               | 6.564649     | 3.596596      | General Hospital  | 1983               | 869            |
| 15  | Ikorodu MCC                                            | 6.608265     | 3.499394      | MCC               | 1983               | 2,820          |
| 16  | Institute of Maternal and Child Health - Àyinkẹ House* | 6.590868     | 3.34092       | Tertiary Hospital | 1955               | -              |
| 17  | Isolo MCC                                              | 6.527787     | 3.318979      | MCC               | 1975               | 2,147          |
| 18  | Lagos Island Maternity Hospital                        | 6.448543     | 3.397417      | Tertiary Hospital | 1960               | 3,681          |
| 19  | Lagos University Teaching Hospital                     | 6.517803     | 3.353786      | Tertiary Hospital | 1962               | 2,011          |
| 20  | Mushin General Hospital                                | 6.531566     | 3.348531      | General Hospital  | 1954               | 524            |
| 21  | Onikan Health Care Centre                              | 6.444656     | 3.405436      | General Hospital  | 1971               | 544            |
| 22  | Orile Agege General Hospital                           | 6.635353     | 3.303379      | General Hospital  | 1982               | 1,677          |
| 23  | Randle General Hospital (Gbaja-Surulere MCC)           | 6.50433      | 3.359574      | MCC               | 1960               | 2,056          |
| 24  | Somolu General Hospital                                | 6.536461     | 3.372251      | General Hospital  | 2006               | 619            |

MCC: Maternal and Childcare Centre

\*Facilities not running in 2018. As such no details available on number of deliveries.

Banke-Thomas et al. 2021

**Supplementary Table S2:** Sensitivity Analysis, Referred Group, n=538

| Stillbirth                  |                                     | Odds Ratio | Std. Err. | z     | P>z   | [95% Conf. | Interval] |
|-----------------------------|-------------------------------------|------------|-----------|-------|-------|------------|-----------|
| Booking status              |                                     |            |           |       |       |            |           |
|                             | Un-booked                           | 1          | (base)    |       |       |            |           |
|                             | Booked                              | .520651    | .2499758  | -1.36 | 0.174 | .2031731   | 1.334219  |
| Coded maternal complication |                                     |            |           |       |       |            |           |
|                             | No maternal complications           | 1          | (base)    |       |       |            |           |
|                             | Prolonged/obstructed labour         | .1151027   | .0662299  | -3.76 | 0.000 | .0372654   | .3555209  |
|                             | Ante-partum/post-partum haemorrhage | .271897    | .1456596  | -2.43 | 0.015 | .0951485   | .7769747  |
|                             | Pre-eclampsia/Eclampsia             | .1563986   | .0831536  | -3.49 | 0.000 | .0551656   | .4434019  |
|                             | Sepsis                              | .3985415   | .2918016  | -1.26 | 0.209 | .0948956   | 1.67379   |
|                             | Others                              | .1778269   | .1148455  | -2.67 | 0.007 | .0501497   | .6305603  |
| Employment status           |                                     |            |           |       |       |            |           |
|                             | Unemployed/Housewife                | 1          | (base)    |       |       |            |           |
|                             | Student                             | .6548489   | .4904522  | -0.57 | 0.572 | .1508793   | 2.842187  |
|                             | Self-employed/Petit- trader         | .5656405   | .1765455  | -1.83 | 0.068 | .3068081   | 1.042832  |
|                             | Self-employed/Mid-High Business     | 1.307745   | .5332521  | 0.66  | 0.511 | .5880757   | 2.908124  |
|                             | Employed                            | .7509751   | .2876442  | -0.75 | 0.455 | .3544801   | 1.59096   |
| Gestation                   |                                     |            |           |       |       |            |           |
|                             | Singleton                           | 1          | (base)    |       |       |            |           |
|                             | Multiple                            | 2.227672   | .9926034  | 1.80  | 0.072 | .9301949   | 5.334928  |
| Parity                      |                                     |            |           |       |       |            |           |
|                             | Nulliparous (0)                     | 1          | (base)    |       |       |            |           |
|                             | Multiparous (1-4)                   | 1.328196   | .3719421  | 1.01  | 0.311 | .7671767   | 2.299476  |
|                             | Grand-multiparous (5 or more)       | .6034033   | .6761629  | -0.45 | 0.652 | .0671068   | 5.425613  |
| Age                         |                                     |            |           |       |       |            |           |
|                             | 12 - 19                             | 1.818446   | 1.688413  | 0.64  | 0.520 | .2946909   | 11.22107  |
|                             | 20 - 34                             | 1          | (base)    |       |       |            |           |
|                             | 35 - 50                             | 1.058522   | .2854312  | 0.21  | 0.833 | .6239829   | 1.795672  |
| Total travel time           |                                     |            |           |       |       |            |           |
|                             | 0-9 minutes                         | 1          | (base)    |       |       |            |           |
|                             | 10-29 minutes                       | 2.702125   | 2.176452  | 1.23  | 0.217 | .5573104   | 13.10128  |
|                             | 30-59 minutes                       | 2.152962   | 1.735693  | 0.95  | 0.342 | .4434122   | 10.45359  |
|                             | 60-119 minutes                      | 1.74776    | 1.40367   | 0.70  | 0.487 | .3621267   | 8.435351  |
|                             | 120-480 minutes                     | 2.493372   | 2.071474  | 1.10  | 0.271 | .4893455   | 12.70453  |
| _cons                       |                                     | .567706    | .54719    | -0.59 | 0.557 | .0858387   | 3.754603  |

Banke-Thomas et al. 2021

**Supplementary Table S3:** Sensitivity Analysis, Non-Referred Group, n=2,259

| Stillbirth                  |                                     | Odds Ratio | Std. Err. | z     | P>z   | [95% Conf. | Interval] |
|-----------------------------|-------------------------------------|------------|-----------|-------|-------|------------|-----------|
| Booking status              |                                     |            |           |       |       |            |           |
|                             | Un-booked                           | 1          | (base)    |       |       |            |           |
|                             | Booked                              | .369942    | .0611896  | -6.01 | 0.000 | .2675114   | .5115935  |
| Coded maternal complication |                                     |            |           |       |       |            |           |
|                             | No maternal complications           | 1          | (base)    |       |       |            |           |
|                             | Prolonged/obstructed labour         | .0643348   | .0200726  | -8.79 | 0.000 | .0349035   | .1185832  |
|                             | Ante-partum/post-partum haemorrhage | .3250163   | .0864367  | -4.23 | 0.000 | .1929886   | .5473668  |
|                             | Pre-eclampsia/Eclampsia             | .1468015   | .0406688  | -6.93 | 0.000 | .0852944   | .2526625  |
|                             | Sepsis                              | .3061309   | .10783    | -3.36 | 0.001 | .1534914   | .6105626  |
|                             | Others                              | .1279533   | .0449722  | -5.85 | 0.000 | .0642505   | .2548159  |
| Employment status           |                                     |            |           |       |       |            |           |
|                             | Unemployed/Housewife                | 1          | (base)    |       |       |            |           |
|                             | Student                             | .9582159   | .36574    | -0.11 | 0.911 | .4534919   | 2.024684  |
|                             | Self-employed/Petit- trader         | .7072552   | .1517899  | -1.61 | 0.107 | .4644005   | 1.077109  |
|                             | Self-employed/Mid-High Business     | 1.323551   | .3369945  | 1.10  | 0.271 | .8035502   | 2.18006   |
|                             | Employed                            | .6852588   | .1708679  | -1.52 | 0.130 | .4203483   | 1.11712   |
| Gestation                   |                                     |            |           |       |       |            |           |
|                             | Singleton                           | 1          | (base)    |       |       |            |           |
|                             | Multiple                            | 2.588755   | .7457234  | 3.30  | 0.001 | 1.471946   | 4.552923  |
| Parity                      |                                     |            |           |       |       |            |           |
|                             | Nulliparous (0)                     | 1          | (base)    |       |       |            |           |
|                             | Multiparous (1-4)                   | .8521085   | .1504627  | -0.91 | 0.365 | .6028265   | 1.204474  |
|                             | Grand-multiparous (5 or more)       | 1.849566   | .7289193  | 1.56  | 0.119 | .8542965   | 4.004339  |
| Age                         |                                     |            |           |       |       |            |           |
|                             | 12 - 19                             | .6083383   | .3448521  | -0.88 | 0.381 | .2002718   | 1.847866  |
|                             | 20 - 34                             | 1          | (base)    |       |       |            |           |
|                             | 35 - 50                             | 1.71517    | .2997976  | 3.09  | 0.002 | 1.217655   | 2.415962  |
| Total travel time           |                                     |            |           |       |       |            |           |
|                             | 0-9 minutes                         | 1          | (base)    |       |       |            |           |
|                             | 10-29 minutes                       | 1.961082   | .4631949  | 2.85  | 0.004 | 1.234376   | 3.115617  |
|                             | 30-59 minutes                       | 1.621841   | .4203171  | 1.87  | 0.062 | .9759112   | 2.695293  |
|                             | 60-119 minutes                      | 1.317994   | .378855   | 0.96  | 0.337 | .750304    | 2.315207  |
|                             | 120-480 minutes                     | 1.744984   | .8822028  | 1.10  | 0.271 | .6478188   | 4.700338  |
| _cons                       |                                     | .6185375   | .2230251  | -1.33 | 0.183 | .3051052   | 1.253956  |

Banke-Thomas et al. 2021

**Supplementary Table S4:** Sensitivity Analysis, Fresh Stillbirths, N=2,675

| Stillbirth                  |                                     | Odds Ratio | Std. Err. | z     | P>z   | [95% Conf. | Interval] |
|-----------------------------|-------------------------------------|------------|-----------|-------|-------|------------|-----------|
| Booking status              |                                     |            |           |       |       |            |           |
|                             | Un-booked                           | 1          | (base)    |       |       |            |           |
|                             | Booked                              | .403047    | .0773501  | -4.73 | 0.000 | .2766934   | .5871008  |
| Coded maternal complication |                                     |            |           |       |       |            |           |
|                             | No maternal complications           | 1          | (base)    |       |       |            |           |
|                             | Prolonged/obstructed labour         | .0731021   | .0252129  | -7.58 | 0.000 | .0371836   | .1437173  |
|                             | Ante-partum/post-partum haemorrhage | .3681245   | .1053156  | -3.49 | 0.000 | .2101247   | .6449297  |
|                             | Pre-eclampsia/Eclampsia             | .1718948   | .0506609  | -5.97 | 0.000 | .096471    | .3062873  |
|                             | Sepsis                              | .31814     | .1251287  | -2.91 | 0.004 | .1471734   | .6877128  |
|                             | Others                              | .1976138   | .0701013  | -4.57 | 0.000 | .0985968   | .3960698  |
| Employment status           |                                     |            |           |       |       |            |           |
|                             | Unemployed/Housewife                | 1          | (base)    |       |       |            |           |
|                             | Student                             | .7979088   | .3578552  | -0.50 | 0.615 | .3312812   | 1.921807  |
|                             | Self-employed/Petit- trader         | .8741547   | .1912821  | -0.61 | 0.539 | .5692838   | 1.342294  |
|                             | Self-employed/Mid-High Business     | 1.236778   | .3423802  | 0.77  | 0.443 | .7188723   | 2.127806  |
|                             | Employed                            | .7421021   | .1967799  | -1.12 | 0.261 | .4413207   | 1.24788   |
| Gestation                   |                                     |            |           |       |       |            |           |
|                             | Singleton                           | 1          | (base)    |       |       |            |           |
|                             | Multiple                            | 2.564732   | .7363595  | 3.28  | 0.001 | 1.461012   | 4.502257  |
| Parity                      |                                     |            |           |       |       |            |           |
|                             | Nulliparous (0)                     | 1          | (base)    |       |       |            |           |
|                             | Multiparous (1-4)                   | .9306698   | .171933   | -0.39 | 0.697 | .6479532   | 1.336742  |
|                             | Grand-multiparous (5 or more)       | 1.746394   | .7401753  | 1.32  | 0.188 | .7609864   | 4.007814  |
| Age                         |                                     |            |           |       |       |            |           |
|                             | 12 - 19                             | .7133609   | .4467619  | -0.54 | 0.590 | .2090359   | 2.434432  |
|                             | 20 - 34                             | 1          | (base)    |       |       |            |           |
|                             | 35 - 50                             | 1.529114   | .2671416  | 2.43  | 0.015 | 1.085755   | 2.153514  |
| Referral                    |                                     |            |           |       |       |            |           |
|                             | No                                  | 1          | (base)    |       |       |            |           |
|                             | Yes                                 | 1.489106   | .2764     | 2.15  | 0.032 | 1.034975   | 2.142502  |
| Total travel time           |                                     |            |           |       |       |            |           |
|                             | 0-9 minutes                         | 1          | (base)    |       |       |            |           |
|                             | 10-29 minutes                       | 2.195466   | .6361816  | 2.71  | 0.007 | 1.244152   | 3.874181  |
|                             | 30-59 minutes                       | 2.132996   | .6453007  | 2.50  | 0.012 | 1.178892   | 3.859279  |
|                             | 60-119 minutes                      | 1.288978   | .4267022  | 0.77  | 0.443 | .6736971   | 2.46619   |
|                             | 120-480 minutes                     | 2.407568   | .962584   | 2.20  | 0.028 | 1.09965    | 5.271115  |
| _cons                       |                                     |            |           |       |       |            |           |
|                             |                                     | .2478592   | .1032393  | -3.35 | 0.001 | .1095618   | .5607264  |

Banke-Thomas et al. 2021

**Supplementary Table S5:** Sensitivity Analysis, Macerated Stillbirths, N=2,599

| Stillbirth                          | Odds Ratio | Std. Err. | z     | P>z   | [95% Conf. Interval] |
|-------------------------------------|------------|-----------|-------|-------|----------------------|
| Booking status                      |            |           |       |       |                      |
| Un-booked                           | 1          | (base)    |       |       |                      |
| Booked                              | .3357338   | .0816779  | -4.49 | 0.000 | .2084075 .54085      |
| Coded maternal complication         |            |           |       |       |                      |
| No maternal complications           | 1          | (base)    |       |       |                      |
| Prolonged/obstructed labour         | .0834752   | .0306951  | -6.75 | 0.000 | .0406029 .1716159    |
| Ante-partum/post-partum haemorrhage | .2667078   | .087031   | -4.05 | 0.000 | .1406939 .5055874    |
| Pre-eclampsia/Eclampsia             | .1287584   | .0434935  | -6.07 | 0.000 | .0664121 .2496342    |
| Sepsis                              | .3210424   | .1407909  | -2.59 | 0.010 | .135917 .7583173     |
| Others                              | .0695048   | .037138   | -4.99 | 0.000 | .0243892 .1980759    |
| Employment status                   |            |           |       |       |                      |
| Unemployed/Housewife                | 1          | (base)    |       |       |                      |
| Student                             | 1.072413   | .4922673  | 0.15  | 0.879 | .4361512 2.63686     |
| Self-employed/Petit- trader         | .386265    | .1051595  | -3.49 | 0.000 | .2265418 .6586009    |
| Self-employed/Mid-High Business     | 1.451442   | .4285102  | 1.26  | 0.207 | .8137644 2.588812    |
| Employed                            | .6698821   | .1993272  | -1.35 | 0.178 | .3738682 1.200268    |
| Gestation                           |            |           |       |       |                      |
| Singleton                           | 1          | (base)    |       |       |                      |
| Multiple                            | 2.63033    | .9469172  | 2.69  | 0.007 | 1.298907 5.326504    |
| Parity                              |            |           |       |       |                      |
| Nulliparous (0)                     | 1          | (base)    |       |       |                      |
| Multiparous (1-4)                   | .9316755   | .2103572  | -0.31 | 0.754 | .598518 1.450281     |
| Grand-multiparous (5 or more)       | 1.411074   | .8332897  | 0.58  | 0.560 | .4434913 4.489673    |
| Age                                 |            |           |       |       |                      |
| 12 - 19                             | .741245    | .4829908  | -0.46 | 0.646 | .2066921 2.658273    |
| 20 - 34                             | 1          | (base)    |       |       |                      |
| 35 - 50                             | 1.484419   | .3416001  | 1.72  | 0.086 | .9455289 2.330442    |
| Referral                            |            |           |       |       |                      |
| No                                  | 1          | (base)    |       |       |                      |
| Yes                                 | 1.293543   | .3112718  | 1.07  | 0.285 | .8071459 2.07305     |
| Total travel time                   |            |           |       |       |                      |
| 0-9 minutes                         | 1          | (base)    |       |       |                      |
| 10-29 minutes                       | 1.76711    | .5776148  | 1.74  | 0.082 | .9311753 3.353479    |
| 30-59 minutes                       | 1.029685   | .3807361  | 0.08  | 0.937 | .4988435 2.125419    |
| 60-119 minutes                      | 1.428948   | .5245364  | 0.97  | 0.331 | .6959183 2.934096    |
| 120-480 minutes                     | 1.192601   | .6546144  | 0.32  | 0.748 | .4066998 3.497169    |
| _cons                               | .3752418   | .1741075  | -2.11 | 0.035 | .1511348 .9316613    |
